# Supplementary material
Source: Royal Society of Chemistry journal article supplement (doi:10.1039/d6tb00216a)
Supplement: d6tb00216a1.pdf [file d6tb00216a1.pdf]

## Supporting Information

### Trimetallic nano trap-mediated glycolytic and mitochondrial metabolism co-inhibition: ATP suppression for enhanced metal ion-interference therapy

Qingqing Wang<sup>b,‡</sup>, Kun Yan<sup>d,‡</sup>, Lin Zhu<sup>a</sup>, Jiaxin Li<sup>a</sup>, Sen Li<sup>c</sup>, Yiyan Miao<sup>a</sup>, Yansong Shen<sup>c</sup>, Lei Cao<sup>a,\*</sup>, Haijiao Chen<sup>a,\*</sup>, Guiping Yu<sup>d,\*</sup>, Dihai Gu<sup>c,\*</sup>

<sup>a</sup> Wuxi Key Laboratory of Biomaterials for Clinical Application, Department of Central Laboratory, Jiangyin Clinical College of Xuzhou Medical University, Wuxi, 214400, P. R. China

<sup>b</sup> Department of Chemistry, Nanjing Senior High School of Jiangsu Province, Wuxi, 214437, P. R. China

<sup>c</sup> Anhui Provincial Key Laboratory of Advanced Catalysis and Energy Materials, Anhui Key Laboratory of Optoelectronic Magnetic Functional Complex and Nano Complex, School of Chemistry and Chemical Engineering, Anqing Normal University, Anqing 261433, P. R. China

<sup>d</sup> Department of Cardio-Thoracic Surgery, Jiangyin Clinical College of Xuzhou Medical University, Wuxi, 214400, P. R. China

‡ These authors have contributed equally to the work.

#### \* Corresponding Author

E-mail addresses: [dihaigu@aqnu.edu.cn](mailto:dihaigu@aqnu.edu.cn), [xiaoyuer97103@163.com](mailto:xiaoyuer97103@163.com), [jyhaijiaochen@126.com](mailto:jyhaijiaochen@126.com)

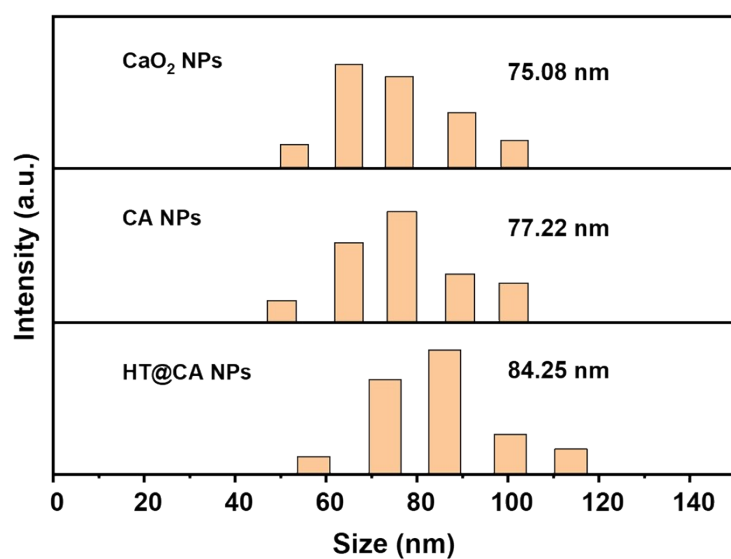

**Figure S1.** Plane size of CaO<sub>2</sub> NPs, CA NPs, and HT@CA NPs counted from corresponding TEM images.

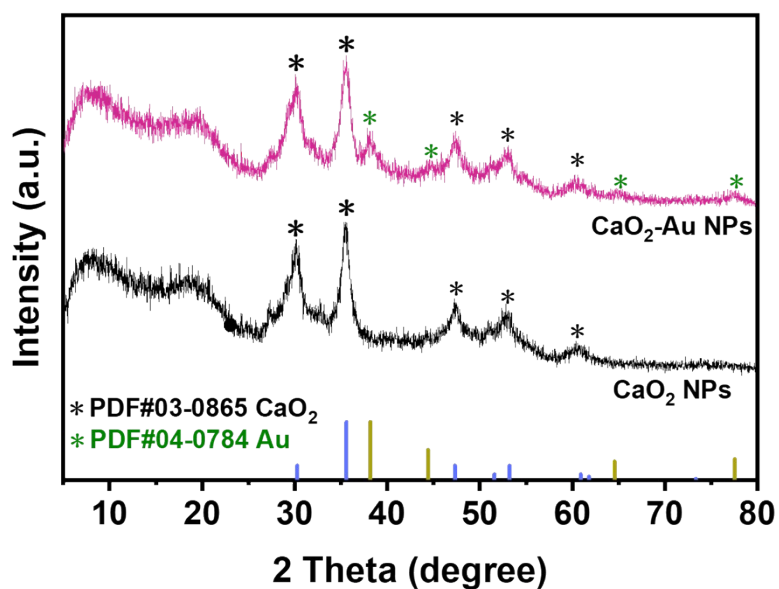

**Figure S2.** XRD spectra of CaO<sub>2</sub> NPs and CaO<sub>2</sub>-Au NPs (CA NPs).

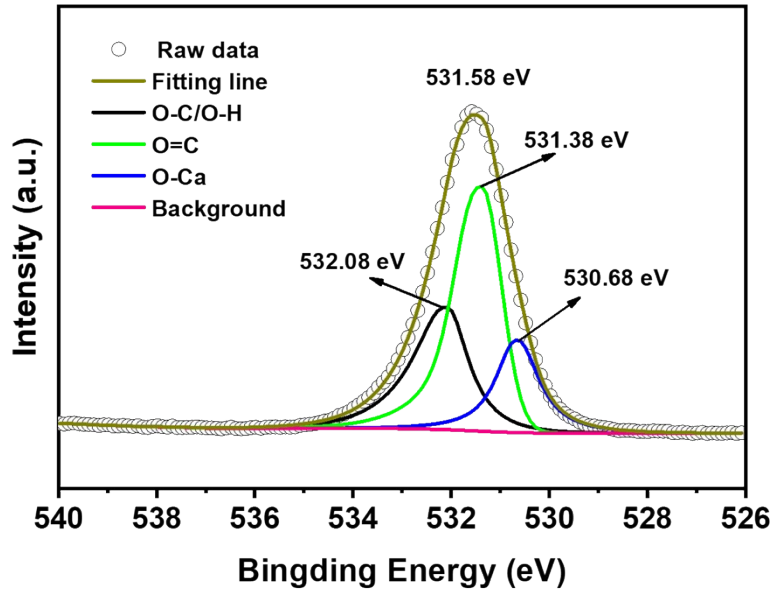

**Figure S3.** The core level XPS spectra of O1s.

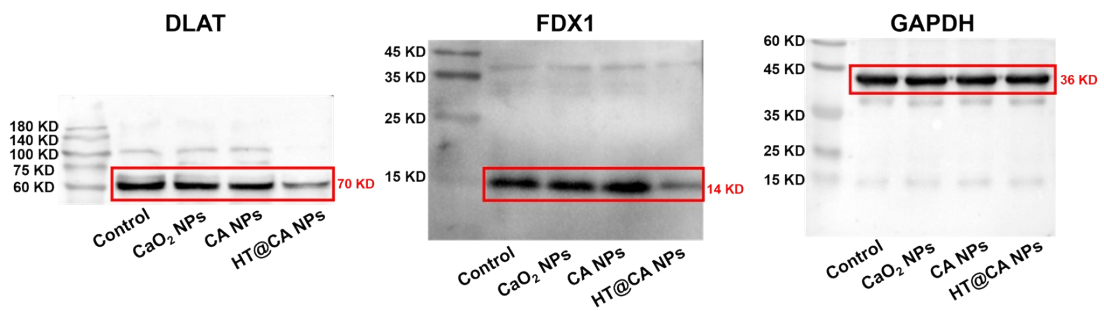

**Figure S4.** Western blot analysis of cuproptosis-related proteins in H1975 cells under different treatments.

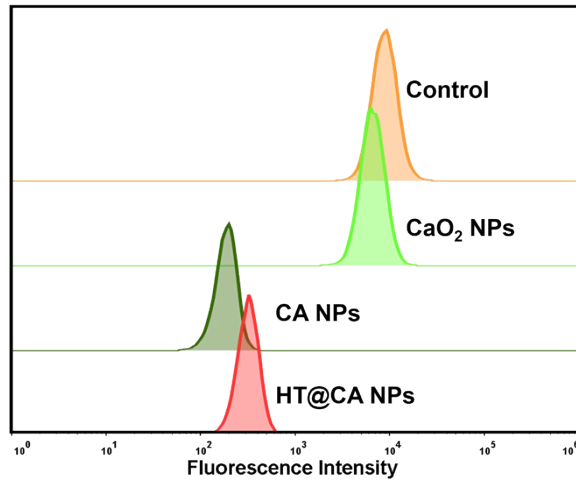

**Figure S5.** Flow cytometry of assays of BCECF levels in H1975 cells incubated with various formulations.

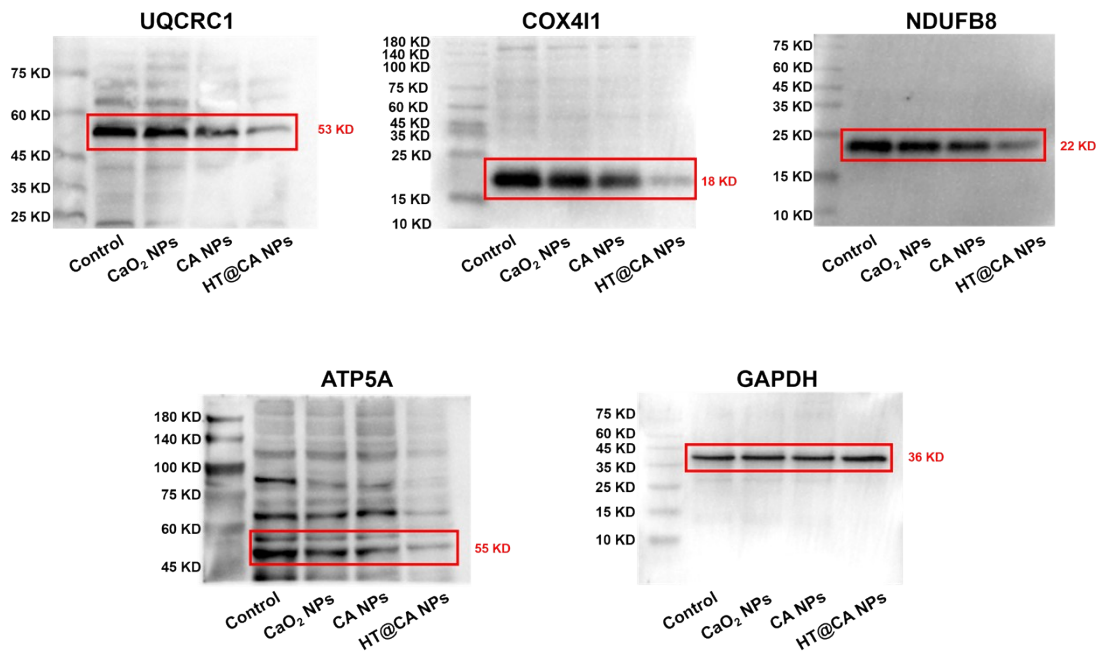

**Figure S6.** Western blot analysis for the expressions of UQCRC1, COX411, NDUFB8, and ATP5A.

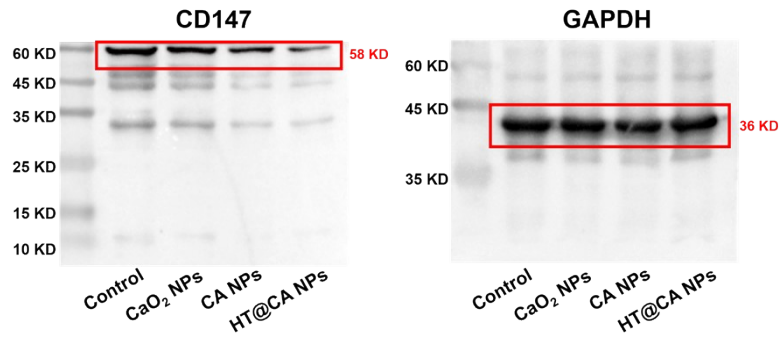

**Figure S7.** After different treatments, the expression of CD147 in H1975 cells were tested by western blot.
